# Supplementary material
Source: PubMed Central journal article supplement (PMC6048393)
Supplement: ajcr0008-1090-f8.pdf [file ajcr0008-1090-f8.pdf]

## Chinese herb medicine BENC improves outcomes of gastric cancer patients

**Supplementary Table 1.** The pharmaceutical ingredients of Bo-Er-Ning capsules

| Latin name                                     | English name                                | Chinese name |
|------------------------------------------------|---------------------------------------------|--------------|
| <i>Radix Astragali Seu Hedysari Praeparata</i> | Prepared Manyinflorescenced Sweetvetch Root | Zhi Huang Qi |
| <i>Ligustrum Lucidum</i>                       | Glossy Privet Fruit                         | Nv Zhen Zi   |
| <i>Tulipa Edulis</i>                           | Edible Tulip                                | Guang Ci Gu  |
| <i>Portulaca Oleracea</i>                      | Purslane                                    | Ma Chi Xian  |
| <i>Rhizoma Paridis</i>                         | Paris Root                                  | Chong Lou    |
| <i>Solanum Nigrum</i>                          | Black Nightshade                            | Long Kui     |
| <i>Fructus Perillae</i>                        | Perilia Fruit                               | Zi Su Zi     |
| <i>Gallus Gallus Domesticus</i>                | Chicken's Gizzard Endothelium               | Ji Nei Jin   |
| <i>Rheum Officinale</i>                        | Rheum Palmatum                              | Da Huang     |
| <i>Dryobalanops Aromatica</i>                  | Borneol                                     | Bing Pian    |
| <i>Bombyx Batryticatus</i>                     | Stiff Silkworm                              | Jiang Can    |
